# Supplementary material
Source: PubMed Central journal article supplement (PMC5102514)
Supplement: NIHMS723170-supplement-data_description.pdf [file NIHMS723170-supplement-data_description.pdf]

## Appendix S3: Description of Data

Our target region is defined by “IBRA” regions (Interim Biogeographic Regionalisation of Australia) in the state of New South Wales (NSW) (Figure C1). Our selected IBRA regions cover the NSW coast and escarpments, tablelands and inland slopes of the Great Dividing Range. Species were selected based on several criteria: (a) likely to be detected if present; (b) likely to be correctly identified; (c) a large proportion of the extant species range in the selected IBRA regions; (d) survey data (presence-absence) well known to one of the authors (DK).

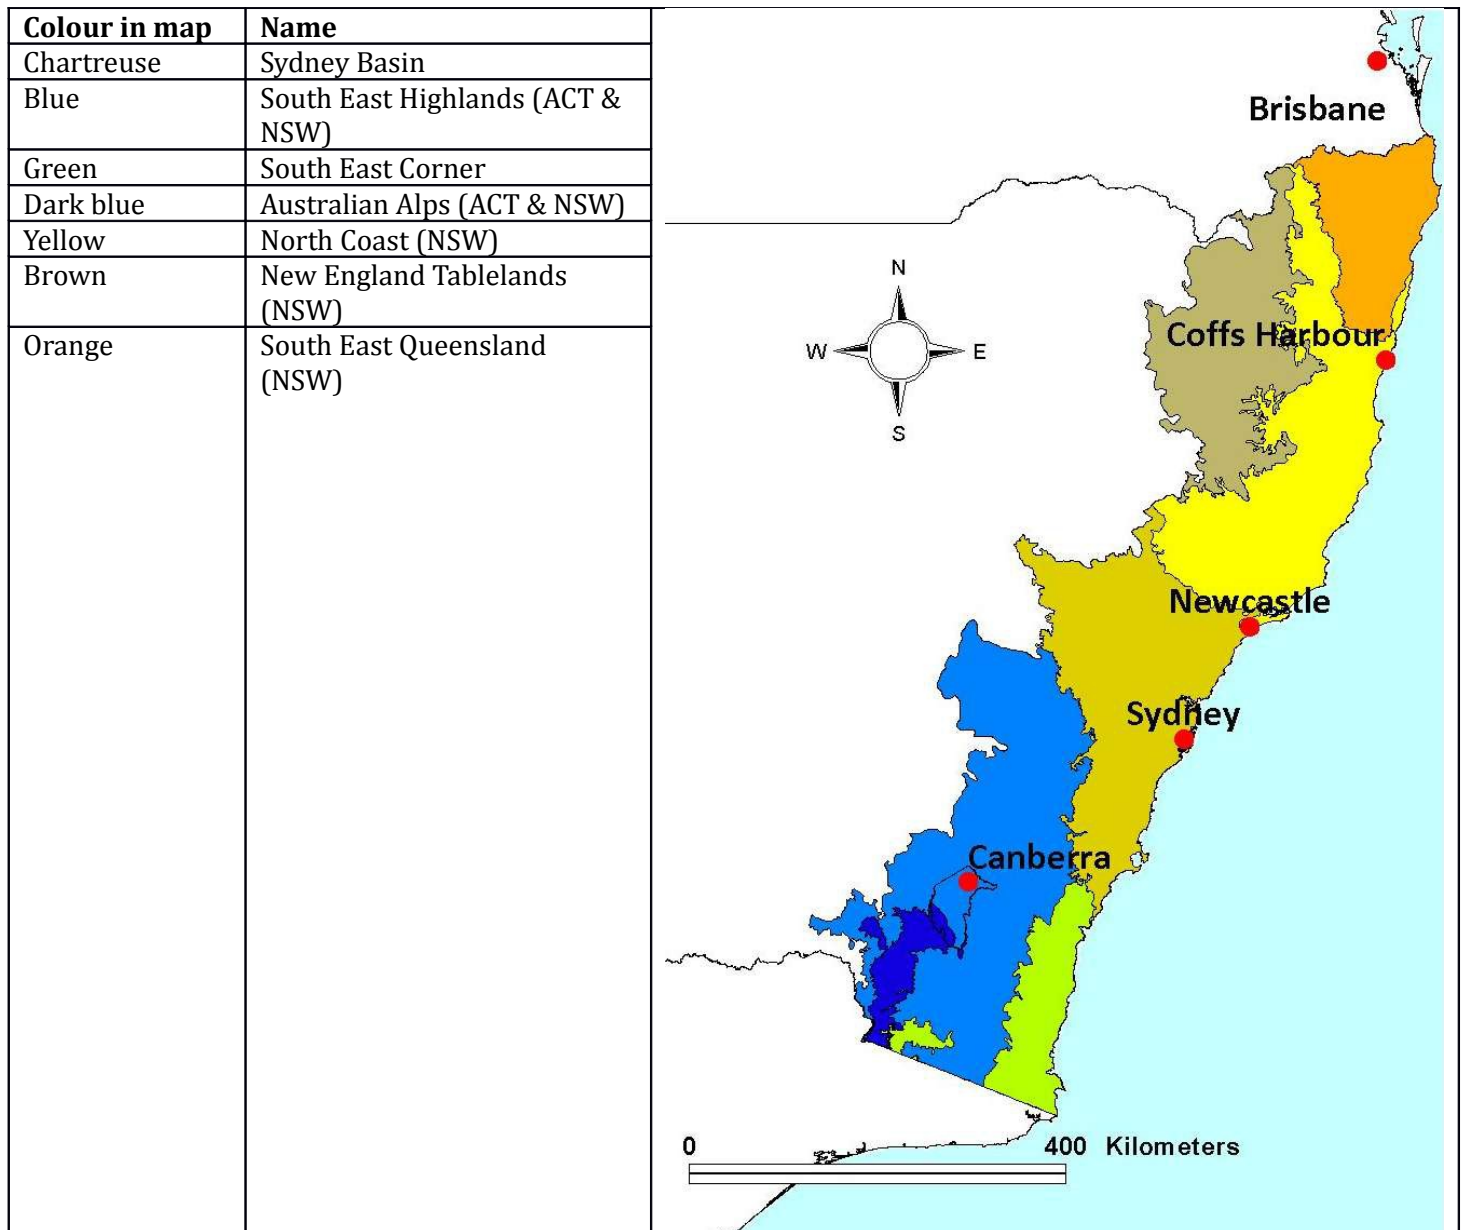

Figure C1: IBRA regions used in the study.

All species data were collated July to August 2013. Presence-absence (PA) data were downloaded from the Flora Survey Module of the Atlas of NSW Wildlife, Office of Environment and Heritage (OEH). All “full floristics” data for all selected IBRA regions were downloaded. All quadrats were retained except for 10 recorded prior to 1970 and 122 whose locations had missing environmental data. This left 32612 quadrats, with 7 to 2003 presence records per species (Table C1)

Presence-only (PO) data were sourced from two repositories:

1. "NSW Atlas" - records from the Atlas of NSW Wildlife, Office of Environment and Heritage (OEH). The full record set included presence records from the PA data; PA presences were removed using the "LocationKey" unique identifier. Species names as per Table C1 were used; downloads included all subspecies. This Atlas can be accessed at <http://www.bionet.nsw.gov.au/> (last accessed July 2014)
2. "ALA" – records from the Atlas of Living Australia, excluding those with data provider = OEH. See Table C1 for details of any decisions about species nomenclature. This atlas can be accessed at <http://www.ala.org.au/> (last accessed July 2014).

These two data sources were combined, then PO data further "cleaned" as follows:

- no records prior to 1970 were retained, since older records tend to have poorer locational accuracy
- all recorded accuracies were initially retained. This decision was based on the knowledge that accuracies are assigned in different ways depending on the data provider, sometimes based on record date rather than on true accuracy information. Visual checks of random subsets of the data across accuracy classes led us to conclude that records assigned a less accurate location class were no more likely to be in unlikely locations than those with supposedly accurate locations (basis for judgement: expert knowledge of species and their distribution: DK)
- for each species, records were reduced to one per unique location, where "unique" = rounded to closest metre. This decision reflects the fact that atlas records are submitted from multiple providers, and multiple records of the same species are possible. For instance, a collector might take several specimens from a tree and lodge them in different herbaria. Similarly, the same tree might be recorded by different people or at different times.
- all records for all species were visually examined in a GIS by DK and clearly erroneous records deleted
- records for *Eucalyptus dalrympleana* were divided into northern and southern "species" (at latitude -32.5 degrees) because they are known to have different environmental associations.

**Table C1: Details of species (table continues over page)**

| Species name                                                 | Species code | #<br>Presences<br>in PA | #<br>Presences<br>in PO | Comments                                                     |
|--------------------------------------------------------------|--------------|-------------------------|-------------------------|--------------------------------------------------------------|
| <i>Angophora bakeri</i>                                      | angobake     | 439                     | 508                     |                                                              |
| <i>Corymbia eximia</i>                                       | coryxim      | 438                     | 502                     |                                                              |
| <i>Corymbia maculata</i>                                     | corymacu     | 1388                    | 1806                    |                                                              |
| <i>Eucalyptus agglomerata</i>                                | eucaaggl     | 1025                    | 1009                    |                                                              |
| <i>Eucalyptus aggregata</i>                                  | eucaaggr     | 22                      | 154                     |                                                              |
| <i>Eucalyptus blaxlandii</i>                                 | eucablax     | 225                     | 183                     |                                                              |
| <i>Eucalyptus cinerea</i>                                    | eucacine     | 55                      | 171                     |                                                              |
| <i>Eucalyptus cypellocarpa</i>                               | eucacype     | 1290                    | 1536                    |                                                              |
| <i>Eucalyptus dalrympleana</i> -<br>northern subsp           | eucadalh     | 86                      | 493                     | North of -32.45 latitude                                     |
| <i>Eucalyptus dalrympleana</i> -<br>southern subsp           | eucadalr     | 172                     | 1674                    | South of -32.45 latitude                                     |
| <i>Eucalyptus deanei</i>                                     | eucadean     | 304                     | 182                     |                                                              |
| <i>Eucalyptus delegatensis</i><br>subsp. <i>delegatensis</i> | eucadeld     | 112                     | 271                     |                                                              |
| <i>Eucalyptus dives</i>                                      | eucadive     | 905                     | 1103                    |                                                              |
| <i>Eucalyptus fastigata</i>                                  | eucafast     | 753                     | 993                     |                                                              |
| <i>Eucalyptus fraxinoides</i>                                | eucafrax     | 125                     | 339                     |                                                              |
| <i>Eucalyptus gregsoniana</i>                                | eucagreg     | 7                       | 121                     |                                                              |
| <i>Eucalyptus luehmanniana</i>                               | eucalueh     | 41                      | 358                     |                                                              |
| <i>Eucalyptus moluccana</i>                                  | eucamolu     | 804                     | 1007                    |                                                              |
| <i>Eucalyptus niphophila</i>                                 | eucaniph     | 35                      | 262                     | Named <i>E. pauciflora</i> subsp<br><i>niphophila</i> in ALA |
| <i>Eucalyptus obliqua</i>                                    | eucaobli     | 953                     | 847                     |                                                              |
| <i>Eucalyptus obstans</i>                                    | eucaobst     | 31                      | 166                     | Named <i>E. burgessiana</i> in<br>ALA                        |
| <i>Eucalyptus oreades</i>                                    | eucaorea     | 99                      | 165                     |                                                              |
| <i>Eucalyptus ovata</i>                                      | eucaovat     | 109                     | 209                     |                                                              |
| <i>Eucalyptus parramattensis</i>                             | eucaparr     | 19                      | 1438                    |                                                              |
| <i>Eucalyptus parvula</i>                                    | eucaparv     | 7                       | 116                     |                                                              |
| <i>Eucalyptus pauciflora</i>                                 | eucapauc     | 1094                    | 1489                    |                                                              |
| <i>Eucalyptus pilularis</i>                                  | eucapilu     | 1777                    | 2437                    |                                                              |
| <i>Eucalyptus piperita</i>                                   | eucapipe     | 1762                    | 1633                    |                                                              |
| <i>Eucalyptus punctata</i>                                   | eucapunc     | 2103                    | 1451                    |                                                              |
| <i>Eucalyptus quadrangulata</i>                              | eucaquad     | 141                     | 320                     |                                                              |
| <i>Eucalyptus robusta</i>                                    | eucarobu     | 538                     | 900                     |                                                              |
| <i>Eucalyptus rossii</i>                                     | eucaross     | 613                     | 674                     |                                                              |
| <i>Eucalyptus sieberi</i>                                    | eucasieb     | 2003                    | 2483                    |                                                              |
| <i>Eucalyptus squamosa</i>                                   | eucasqua     | 63                      | 194                     |                                                              |
| <i>Eucalyptus stenostoma</i>                                 | eucasten     | 18                      | 90                      |                                                              |
| <i>Eucalyptus tricarpa</i>                                   | eucatric     | 149                     | 204                     |                                                              |

**Environmental data** included climatic, topographic and substrate variables (Table C2) with 9 second (~ 250m x 250m) grid cells, unprojected.

Table C2. Candidate covariates for species distributions (table continues over page). Note the climate variables are long-term averaged data, using data supplied with ANUCLIM version 6.1 (ANU 2014) and estimated to 9 arc-second based on GeoScience Australia's 9 second Digital Elevation Model.

| Variable code | Variable                                  | units         | Longer explanation or comment                                                                                                                                                                                                      |
|---------------|-------------------------------------------|---------------|------------------------------------------------------------------------------------------------------------------------------------------------------------------------------------------------------------------------------------|
| bc02          | Mean Diurnal Temperature Range            | degrees C     | Mean Diurnal Range (mean(period max-min)) - The mean of all the weekly diurnal temperature ranges. Each weekly diurnal range is the difference between that week's maximum and minimum temperature.                                |
| bc04          | Temperature Seasonality (C of V)          | dimensionless | Temperature Seasonality (C of V) - The temperature Coefficient of Variation (C of V) is the standard deviation of the weekly mean temperatures expressed as a percentage of the mean of those temperatures (i.e. the annual mean). |
| bc05          | Maximum Temperature of Warmest Period     | degrees C     | Maximum Temperature of Warmest Period - The highest temperature of any weekly maximum temperature.                                                                                                                                 |
| bc12          | Annual Precipitation                      | mm            | Annual Precipitation - The sum of all the monthly precipitation estimates.                                                                                                                                                         |
| bc14          | Precipitation of Driest Period            | mm            | Precipitation of Driest Period - The precipitation of the driest week                                                                                                                                                              |
| bc21          | Highest Period Radiation                  | W/m2/day      | Highest Period Radiation - The largest radiation estimate for all weeks.                                                                                                                                                           |
| bc32          | Mean Moisture Index of Highest Quarter MI | index         | Mean Moisture Index of Highest Quarter MI - The quarter of the year having the highest moisture index value is determined (to the nearest week), and the average moisture index value is calculated.                               |

| Variable code | Variable                                                                         | units      | Longer explanation or comment                                                                                                                                                                                                                                                                                                                                                                                                                                                        |
|---------------|----------------------------------------------------------------------------------|------------|--------------------------------------------------------------------------------------------------------------------------------------------------------------------------------------------------------------------------------------------------------------------------------------------------------------------------------------------------------------------------------------------------------------------------------------------------------------------------------------|
| bc33          | Mean Moisture Index of Lowest Quarter MI                                         | index      | Mean Moisture Index of Lowest Quarter MI - The quarter of the year having the lowest moisture index value is determined (to the nearest week), and the average moisture index value is calculated.                                                                                                                                                                                                                                                                                   |
| mvbf          | Mutliresolution valleybottom flatness                                            | index      | MVBF classifies degrees of valley bottom flatness based on integrating estimates of 'flatness' and 'lowness' computed at a range of scales. MVBF is an expression of local relief in terms of valley confinement and floodplain extent with values typically ranging from 2.5 in narrow confined valleys to $\geq 8$ in broad floodplains. Threshold values of 4-4.5 are often used to designate floodplains. See Gallant & Dowling 2003                                             |
| rjja          | rain june july aug                                                               | mm         | Precipitation in June, July, and August                                                                                                                                                                                                                                                                                                                                                                                                                                              |
| rseas         | annual rainfall seasonality - warm (+ve) or cool (-ve) rainfall-dominated period | magnitudes | Annual rainfall seasonality is the factor variable in which warm-season-dominated rainfall is the ratio + warm-season/cool-season, and cool-season-dominated rainfall is the ratio -(minus sign) cool-season/warm-season; where the warm season rainfall is defined as the sum of rainfall over the six months Oct-Nov-Dec-Jan-Feb-Mar and the cool season rainfall is defined as the sum of rainfall over the six months Apr-May-Jun-Jul-Aug-Sep                                    |
| rugg          | Ruggedness                                                                       |            | Std deviation of elevation.in a 5 by 5 cell square centred on the cell of interest. Estimated on the 9 second DEM.                                                                                                                                                                                                                                                                                                                                                                   |
| subs          | Substrate class                                                                  |            | Based on the 1:1 million surface geology of Australia and Keith 2011, but – using Keith's knowledge of local conditions - collapsed to classes 0 (unclassified), 2 (siliceous white sandstones), 5 (low quartz primarily sedimentary), 6 (felsic intrusives), 7 (high quartz sedimentary), 8 (mafic volcanics & intrusives), 11 (floodplain, estuarine and lacustrine alluvium & sediments), 12 (residual alluvial/colluvial sand & gravel), 15 (felsic volcanics ) (see footnote 1) |
| twmd          | Median topographic wetness                                                       |            | Topographic wetness was estimated from a finer grain (~30m) digital elevation model (DEM) by John Gallant, CSIRO, then summarised to 9 second as median or maximum.                                                                                                                                                                                                                                                                                                                  |
| twmx          | Maximum topographic wetness                                                      |            |                                                                                                                                                                                                                                                                                                                                                                                                                                                                                      |

<sup>1</sup> Substrate classes. Note that class 5 (previously “low quartz sedimentary”) includes ex-categories 14 (ultramafic igneous & metamorphics), 19 (aeolian (red) sandplains) and 20 (limestone); class 12 includes 9 (residual alluvial sands); class 11 (previously “floodplain alluvium”) includes 10 (estuarine sediments) and 13 (lacustrine sediments)

## **References**

ANU (2014). Australian National University, ANUCLIM version 6.1.

<http://fennerschool.anu.edu.au/research/products>.

Gallant, J. C. and T. I. Dowling (2003). "A multiresolution index of valley bottom flatness for mapping depositional areas." Water Resources Research **39**(12): 4-1 - 4-13.

Keith, D. A. 2011. Relationships between geodiversity and vegetation in south-eastern Australia. *Proceedings of the Linnean Society of New South Wales* 132:5-26.

**Acknowledgements:** Many thanks to Philip Gleeson, OEH, for help with understanding the database and for checking quarantined records for us. And to Christopher Simpson, OEH, for making the distance to roads layer.
