# Supplementary material
Source: PubMed Central journal article supplement (PMC5102514)

# Fitted Species-Specific Biases

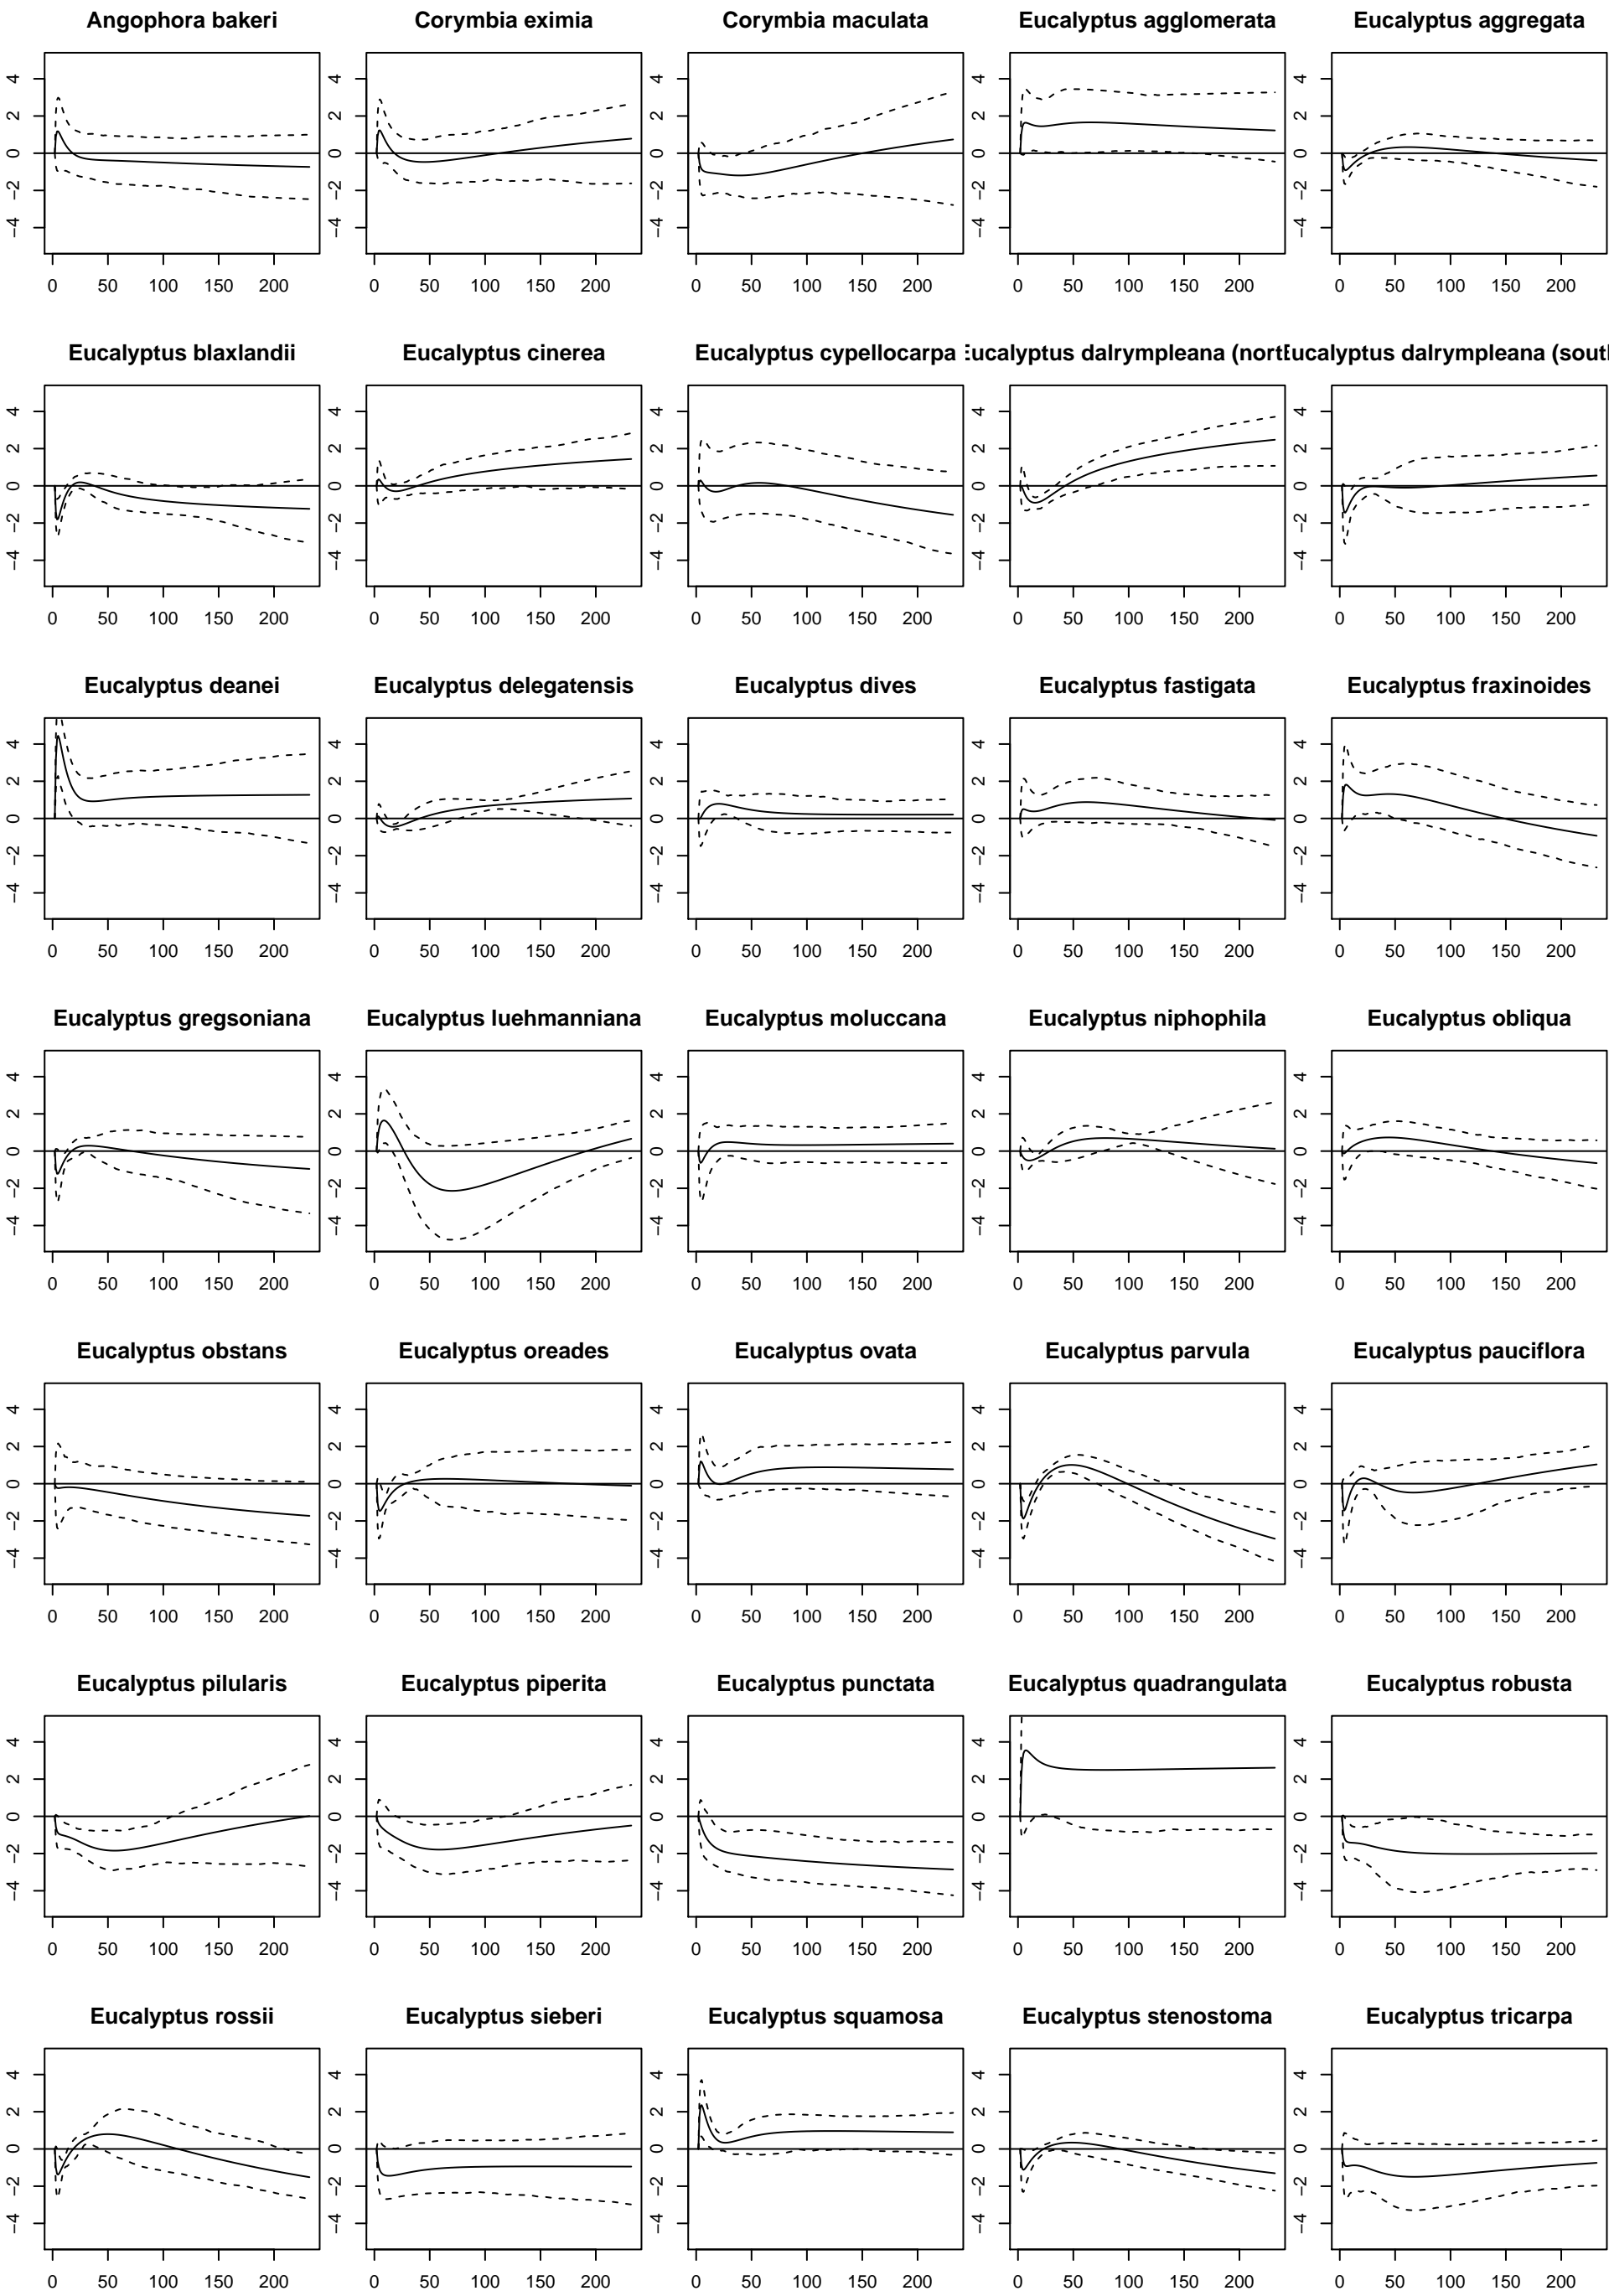

Supplement: NIHMS723170-supplement-Fig_S1.pdf [file NIHMS723170-supplement-Fig_S1.pdf]

# Cross-Validated Log-Likelihood

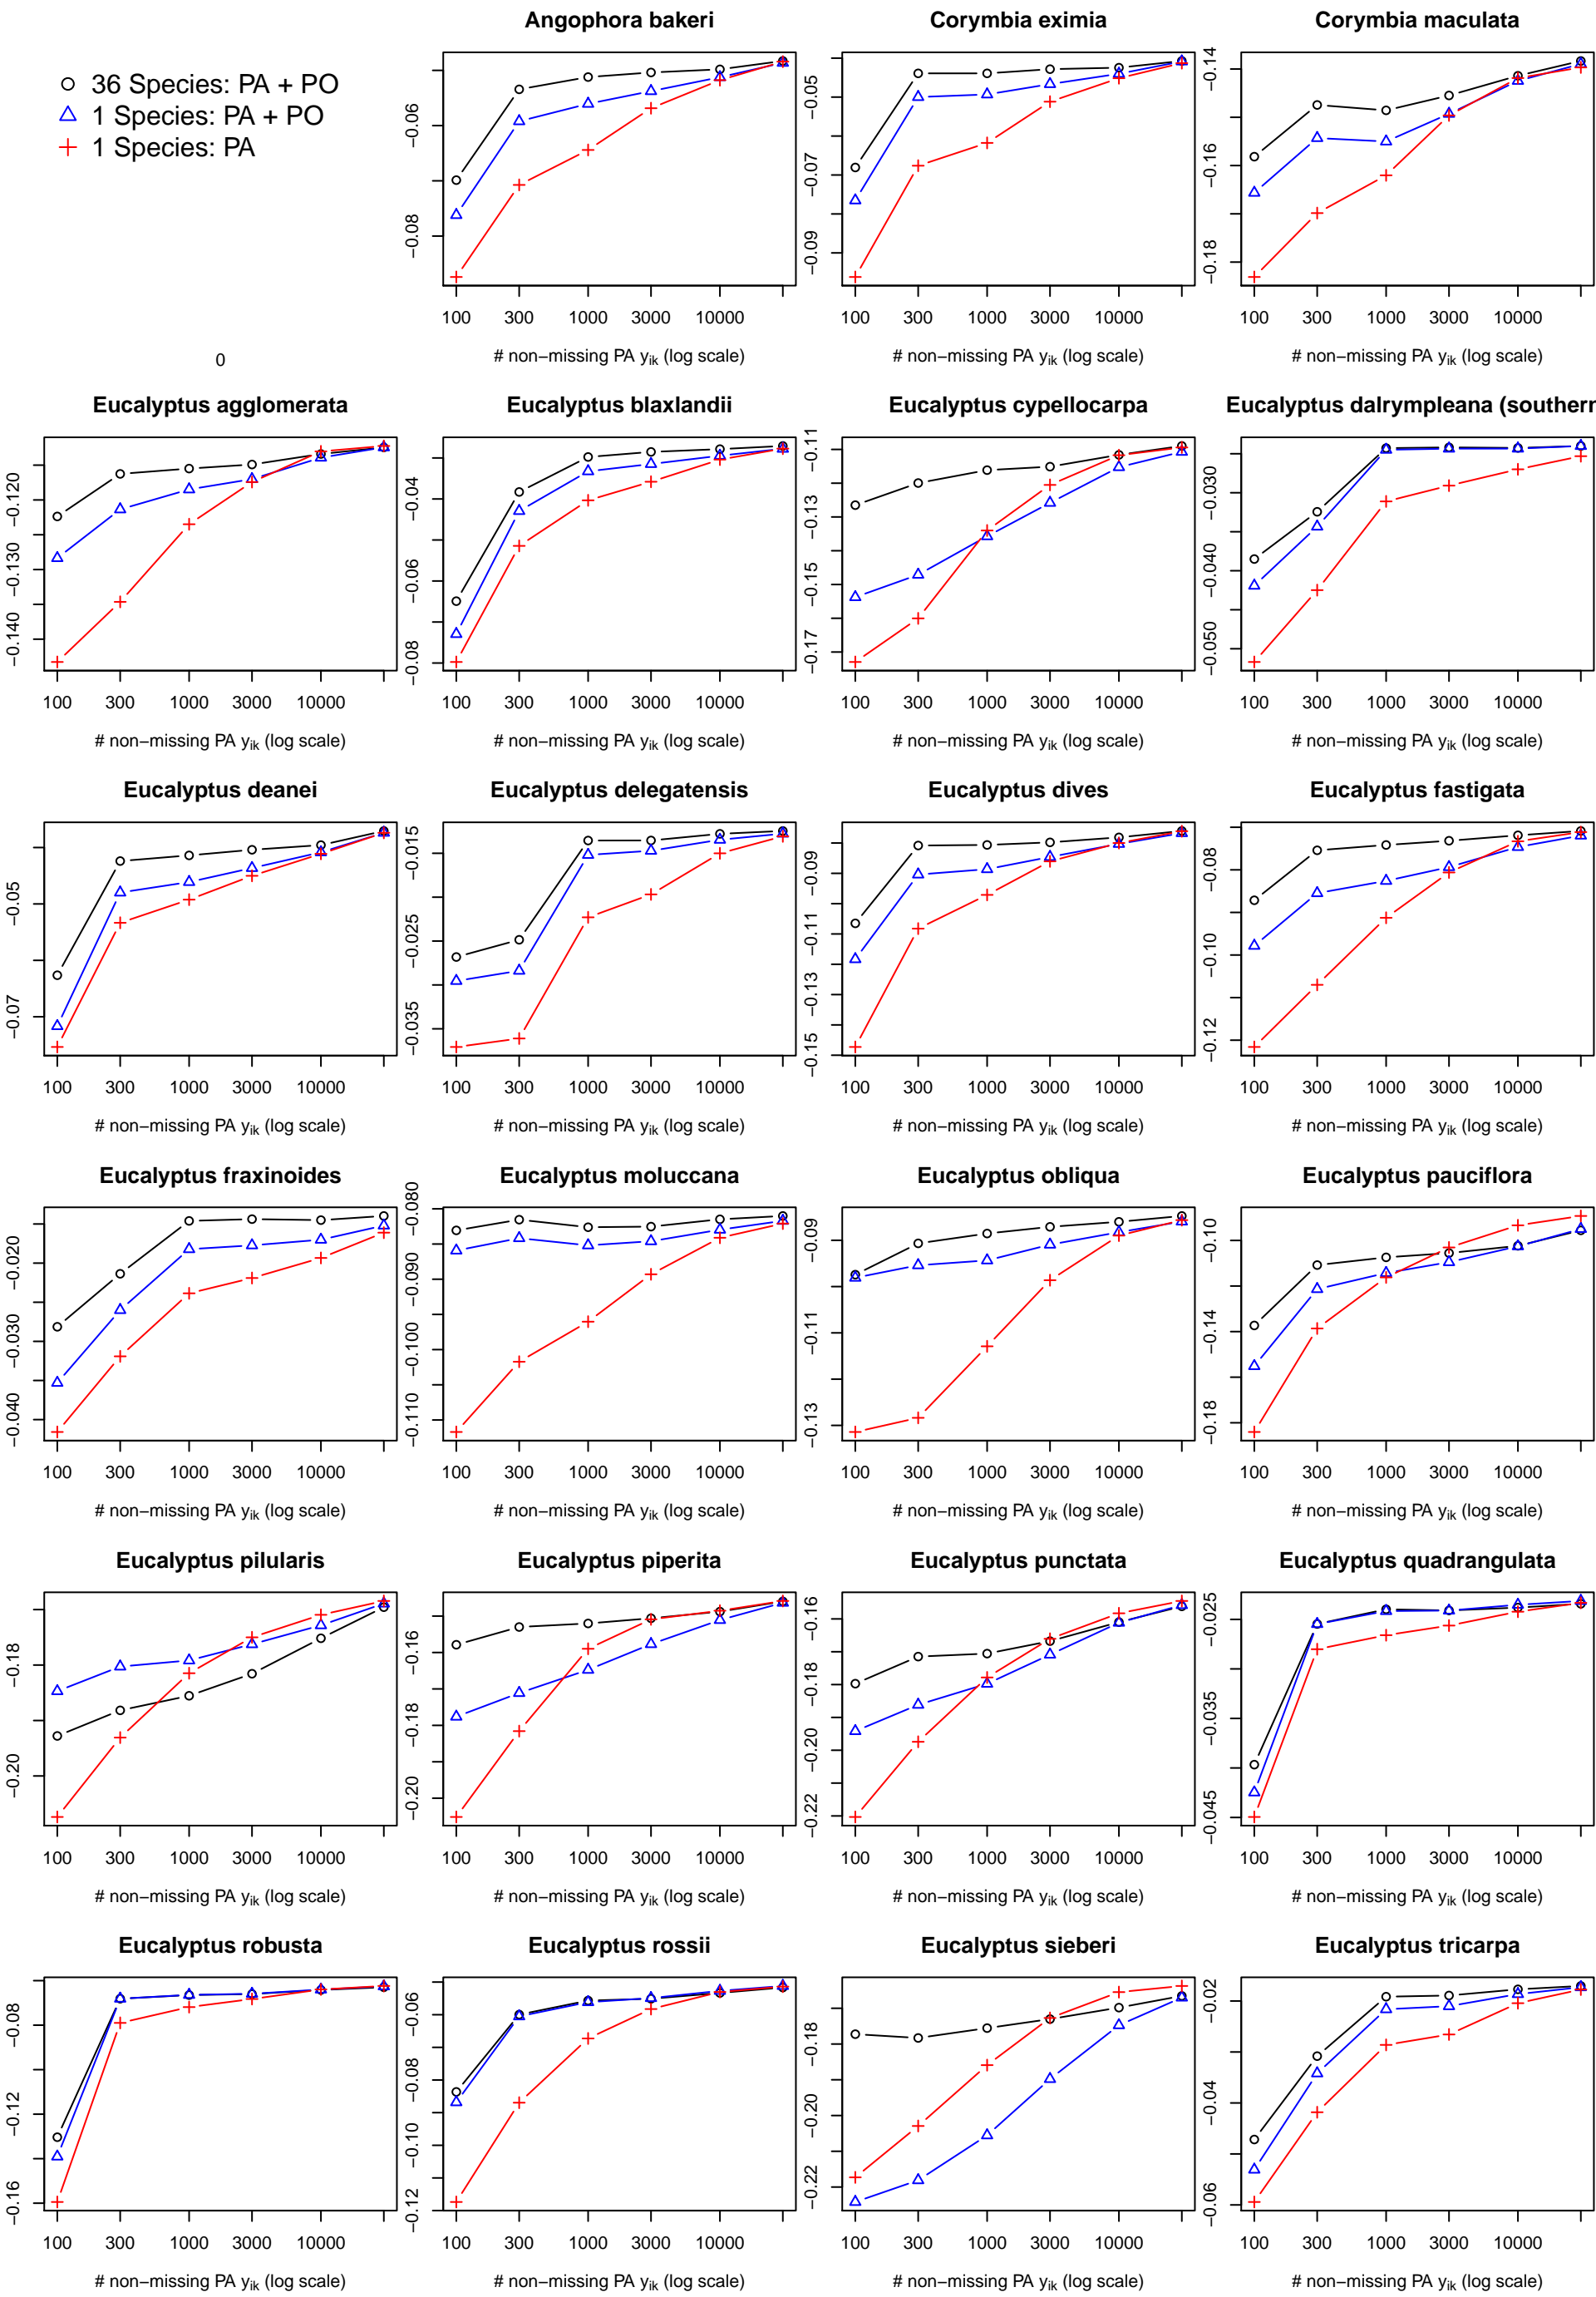

Supplement: NIHMS723170-supplement-Fig_S2.pdf [file NIHMS723170-supplement-Fig_S2.pdf]
